# Supplementary material for: A Pilot Study into the Use of Qualitative Methods to Improve the Awareness of Barriers to Sustainable Medical Waste Segregation within the United Kingdom’s National Health Service
Source: MDPI journal article supplement (doi:10.3390/su16073027), 2024-04-05
Supplement: s1 [file s1]

Archive with 1 entries (1 files):
- sustainability-2885595-supplementary.pdf
