# Supplementary material for: A Pilot Study into the Use of Qualitative Methods to Improve the Awareness of Barriers to Sustainable Medical Waste Segregation within the United Kingdom’s National Health Service
Source: MDPI journal article supplement (doi:10.3390/su16073027), 2024-04-05
Supplement: s1 [file s1 › sustainability-2885595-supplementary.pdf]

## Supplementary Information

### A Pilot Study into the Use of Qualitative Methods to Improve the Awareness of Barriers to Sustainable Medical Waste Segregation within the United Kingdom's National Health Service

Christina Webb<sup>a</sup>, Lorna Anguilano<sup>b</sup>, Ximena Schmidt Rivera<sup>c</sup>

<sup>a</sup> Department of Mechanical and Aerospace engineering, College of Engineering, Design and Physical Sciences, Brunel University London, UB8 3PH, Uxbridge, United Kingdom

<sup>b</sup> Experimental Techniques Centre, College of Engineering, Design and Physical Sciences, Brunel University London, UB8 3PH, Uxbridge, United Kingdom

<sup>c</sup> Department of Chemical engineering, College of Engineering, Design and Physical Sciences, Brunel University London, UB8 3PH, Uxbridge, United Kingdom

**S1:** PowerPoint slides used for the four questions asked during the focus group.

Q1) What questions do you ask yourself when deciding whether a device is infectious or not and therefore which bin it will enter?

| NHS SOP Waste Segregation Guide |                                                                                     |                                                                                     |                                                                                     |                                                                                     |                                                                                      |
|---------------------------------|-------------------------------------------------------------------------------------|-------------------------------------------------------------------------------------|-------------------------------------------------------------------------------------|-------------------------------------------------------------------------------------|--------------------------------------------------------------------------------------|
| Colour Code                     | 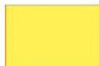 | 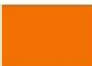 | 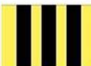 | 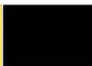 | 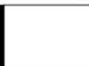 |
| Waste Type                      | Infectious Healthcare / Sharps                                                      | Known infectious Waste                                                              | Offensive Waste                                                                     | Domestic Waste                                                                      | Recyclable Waste                                                                     |
| General Description             | Incineration                                                                        | Incineration or alternative treatment                                               | Landfill or low-heat incineration                                                   | Landfill                                                                            | Recycled                                                                             |

Q2) Are there situations where you are unsure whether waste is infectious or not and so erred on the side of caution and placed it in the infectious waste stream?

Q3) What barriers do you face when identifying if something is recyclable?

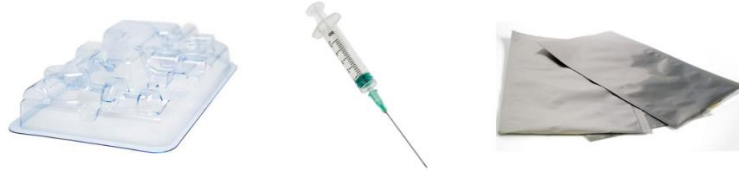

Q4) What method is best to communicate information\* and training on correct waste segregation which requires minimal distraction to your primary job role?

(\*types of plastics that are recyclable, situations which makes a device infectious etc.)

e.g., Briefings, Workshops, Posters, Brochures, Face to face, Other:

**S2:** Images used during the ice-breaker questions asked during the focus group.

Which coloured bin would you put these?

a) Blue face mask

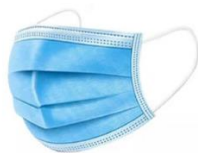

b) Packaging

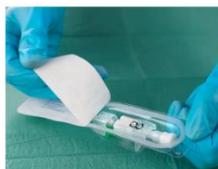

c) Used bandage

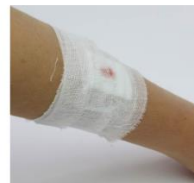

Patient contact? Non-patient contact? Infectious patient? What bins are available? What is it made of? Etc...
